# Supplementary material for: Biological Sensing of Nitric Oxide in Macrophages and Atherosclerosis Using a Ruthenium-Based Sensor
Source: MDPI journal article supplement (doi:10.3390/biomedicines10081807), 2022-07-27
Supplement: s1 [file s1]

## Supplementary materials

### Biological sensing of nitric oxide in **macrophages and** atherosclerosis using a Ruthenium-based sensor

Achini K Vidanapathirana<sup>1,2,4\*</sup>, Jarrad M Goyne<sup>1,2,4\*</sup>, Anna Williamson<sup>1,4</sup>, Benjamin J Pullen<sup>1,2,4</sup>, Pich Chhay<sup>1,4</sup>, Lauren Sandeman<sup>1</sup>, Julien Bensalem<sup>5</sup>, Timothy J Sargeant<sup>5</sup>, Randall Grose<sup>6</sup>, Mark J Crabtree<sup>7</sup>, Run Zhang<sup>3</sup>, Stephen J Nicholls<sup>2,8</sup>, Peter J Psaltis<sup>1,2,4,9</sup> and Christina A Bursill<sup>1,2,4†</sup>

\*Equal author contributions

**Short Title:** Nitric oxide sensor application in atherosclerosis

<sup>1</sup>Vascular Research Centre, Lifelong Health Theme, South Australian Health and Medical Research Institute, Adelaide, South Australia 5000, Australia

<sup>2</sup>Australian Research Council (ARC) Centre of Excellence for Nanoscale BioPhotonics (CNBP)

<sup>3</sup>Australian Institute for Bioengineering and Nanotechnology (AIBN), the University of Queensland, St Lucia, Queensland 4072, Australia

<sup>4</sup>School of Medicine, University of Adelaide, Adelaide, South Australia 5000, Australia.

<sup>5</sup>Lysosomal Health in Ageing, Hopwood Centre for Neurobiology, Lifelong Health Theme, South Australian Health and Medical Research Institute, Adelaide, South Australia 5000, Australia

<sup>6</sup>Cancer Program, Precision Medicine Theme, South Australian Health and Medical Research Institute, Adelaide, South Australia 5000, Australia

<sup>7</sup>Division of Cardiovascular Medicine, British Heart Foundation Centre of Research Excellence, Radcliffe Department of Medicine, University of Oxford, United Kingdom

<sup>8</sup>MonashHeart, Monash University, Clayton, Victoria 3168, Australia.

<sup>9</sup>Department of Cardiology, Central Adelaide Local Health Network, Adelaide, Australia

## Supplementary Figures

### Supplementary Figure S1

Unedited gels from Western blot assessments presented in Figure 2C

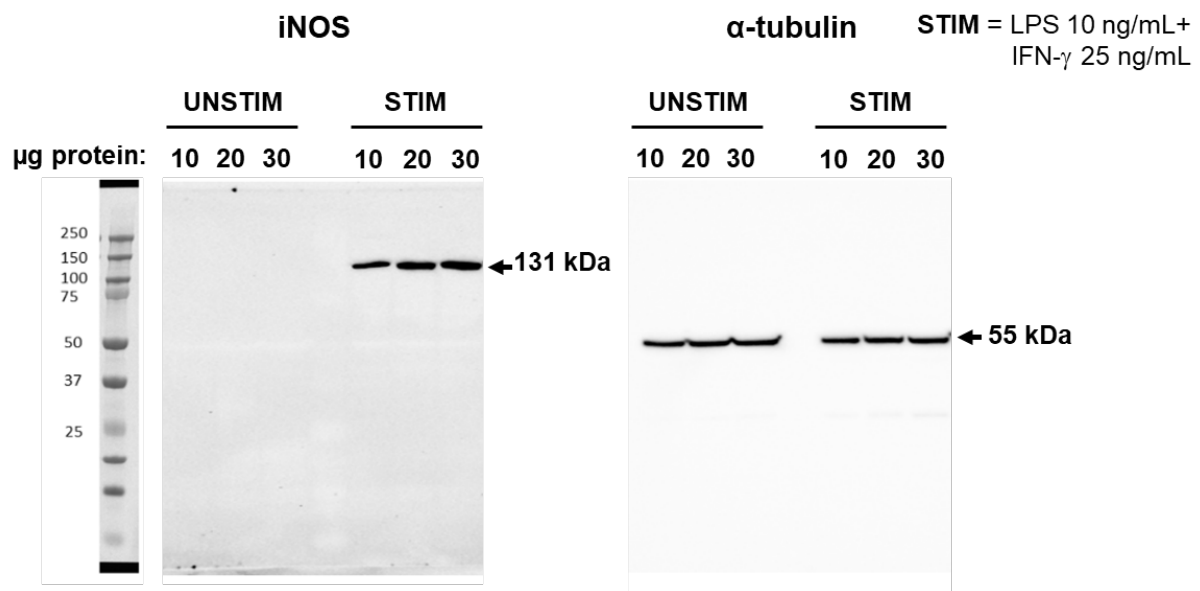

## Supplementary Figure S2

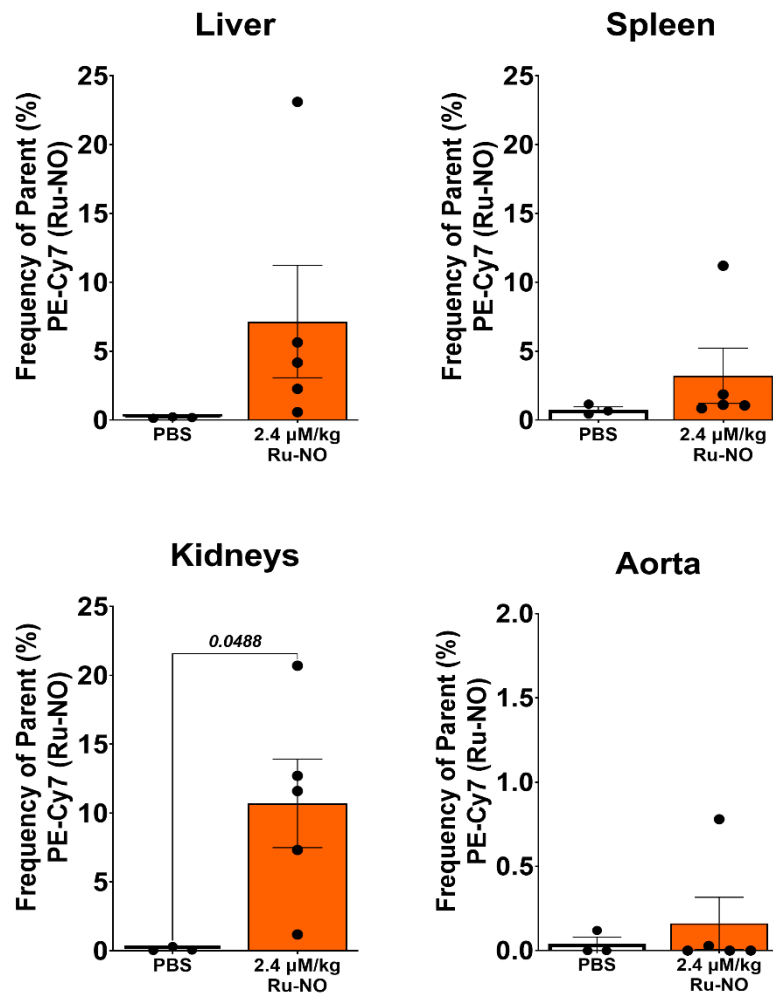

**Supplementary Figure S2. Biodistribution of Ru-NO *in vivo* following intravenous injection.** Ru-NO Fluorescence measured by flow cytometry in the liver, spleen, kidneys and aorta 24 h following intravenous administration of 2.4 $\mu\text{M/kg}$  Ru-NO to C57BL/6J mice.

Mean  $\pm$  SEM,  $p$  values were derived from an unpaired  $t$  test ( $n=3-5$  mice/group)

### Supplementary Figure S3

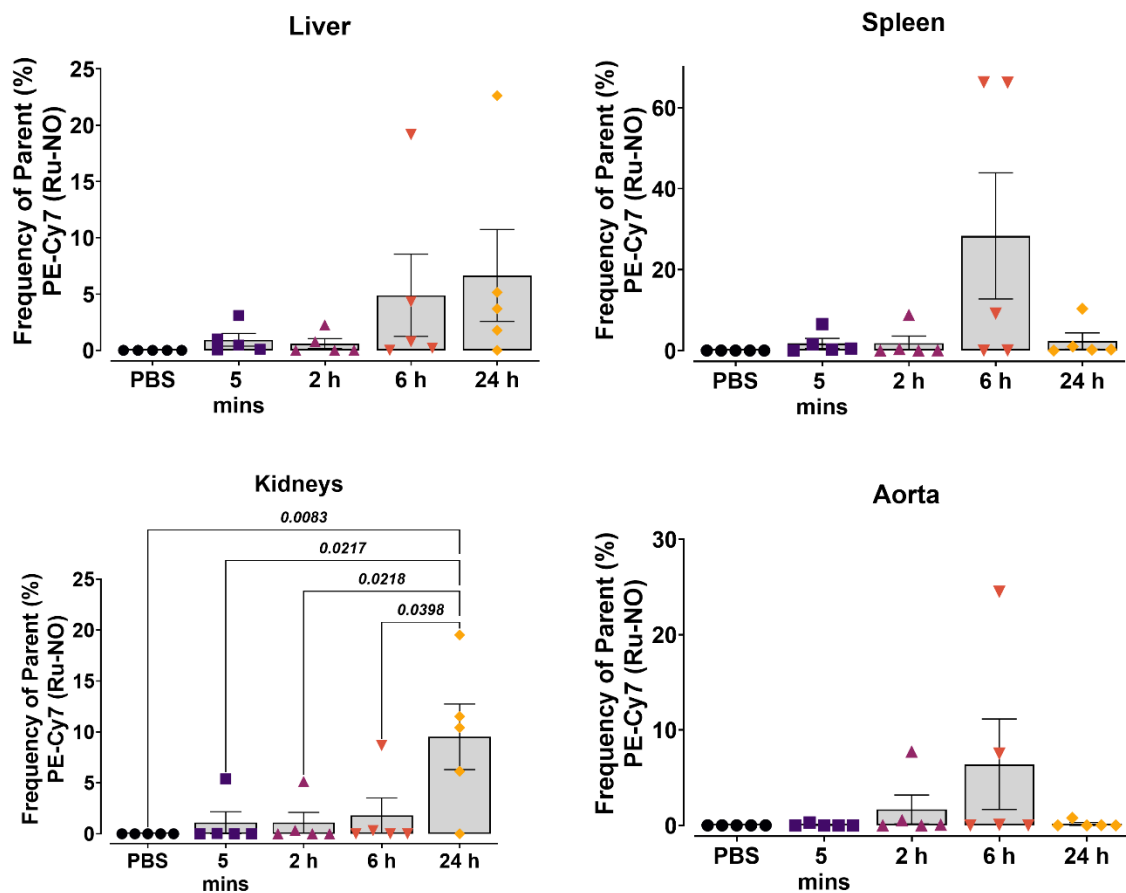

**Supplementary Figure S3. Time course of Ru-NO fluorescence *in vivo* after intravenous infusion.** Ru-NO fluorescence in the liver, spleen, kidneys and aorta at different timepoints following the intravenous administration of 2.4 $\mu$ M/kg Ru-NO to C57BL/6J mice. Mean  $\pm$  SEM, *p* values were derived from a one-way ANOVA with a Tukey's post-hoc test (n=5 mice/group).

## Supplementary Figure S4

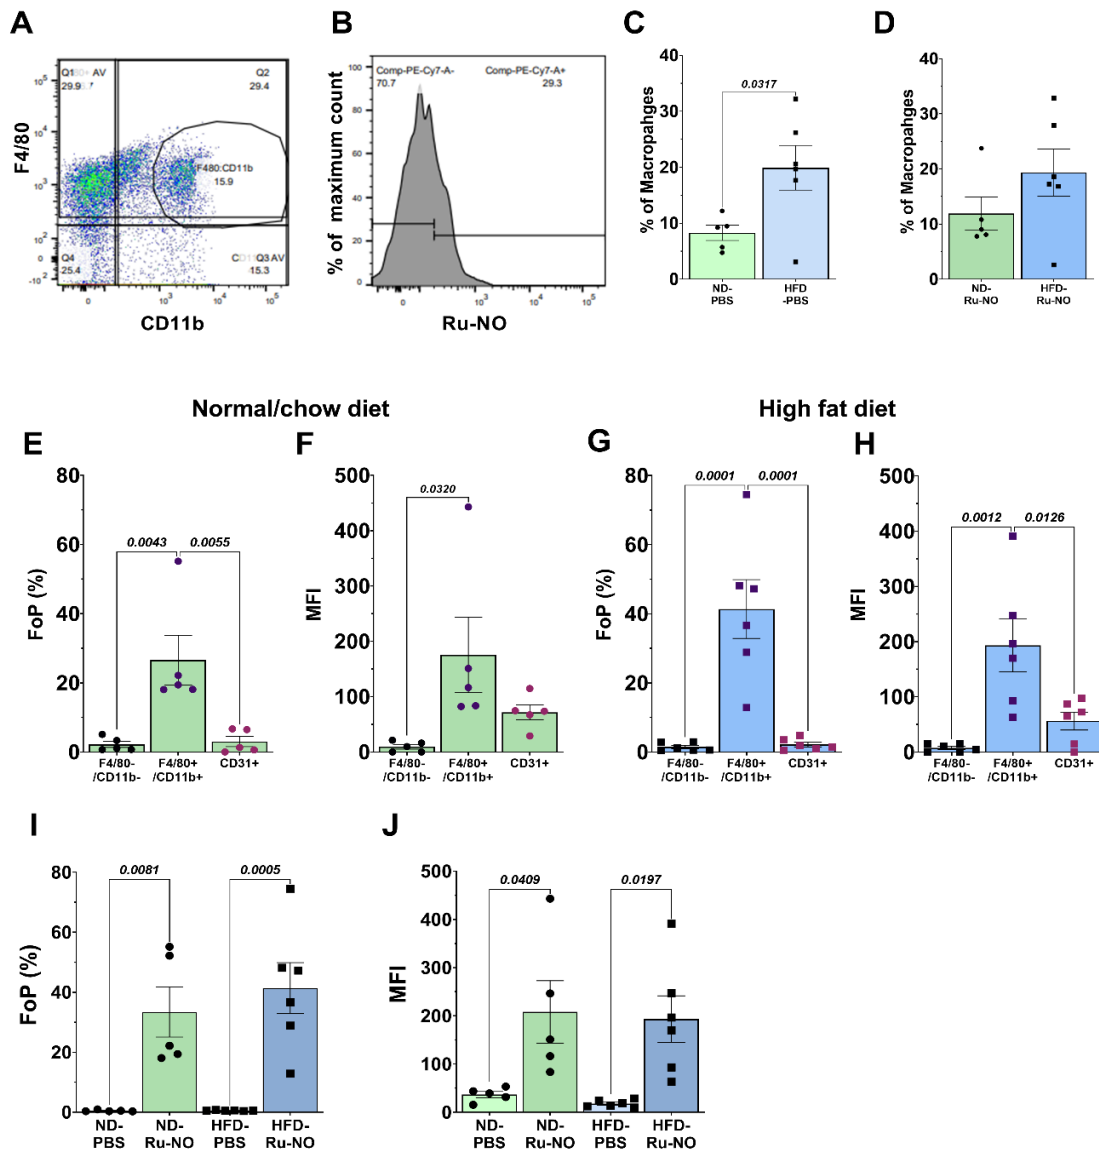

**Supplementary Figure S4. *Ex vivo* uptake of Ru-NO by macrophages in liver cell suspensions from atherosclerotic mice.** **A.** Plot of the distributions of liver cell suspensions incubated with antibodies against CD11b and F4/80 markers. **B.** Histogram demonstrating the shift in Ru-NO fluorescence in liver cell suspensions. Proportion of macrophages in all viable cells following **C.** PBS and **D.** Ru-NO. **E.** FoP and **F.** MFI for Ru-NO fluorescence in **myeloid cells** (CD11b<sup>+</sup>F4/80<sup>-</sup>), macrophages (CD11b<sup>+</sup>F4/80<sup>+</sup>) and endothelial cells (CD31<sup>+</sup>) in chow fed mouse livers. **G.** FoP and **H.** MFI for Ru-NO fluorescence in **HCD** fed livers. **I.** FoP and **J.** MFI in CD11b<sup>+</sup>F4/80<sup>+</sup> macrophages comparing liver cell suspensions from chow and **HCD**-fed mice following PBS or Ru-NO. Mean  $\pm$  SEM,  $p$  values from an unpaired t test or one-way ANOVA, with Tukey post-hoc test for multiple comparisons (n=5-6 mice/group).

## Supplementary Figure S5

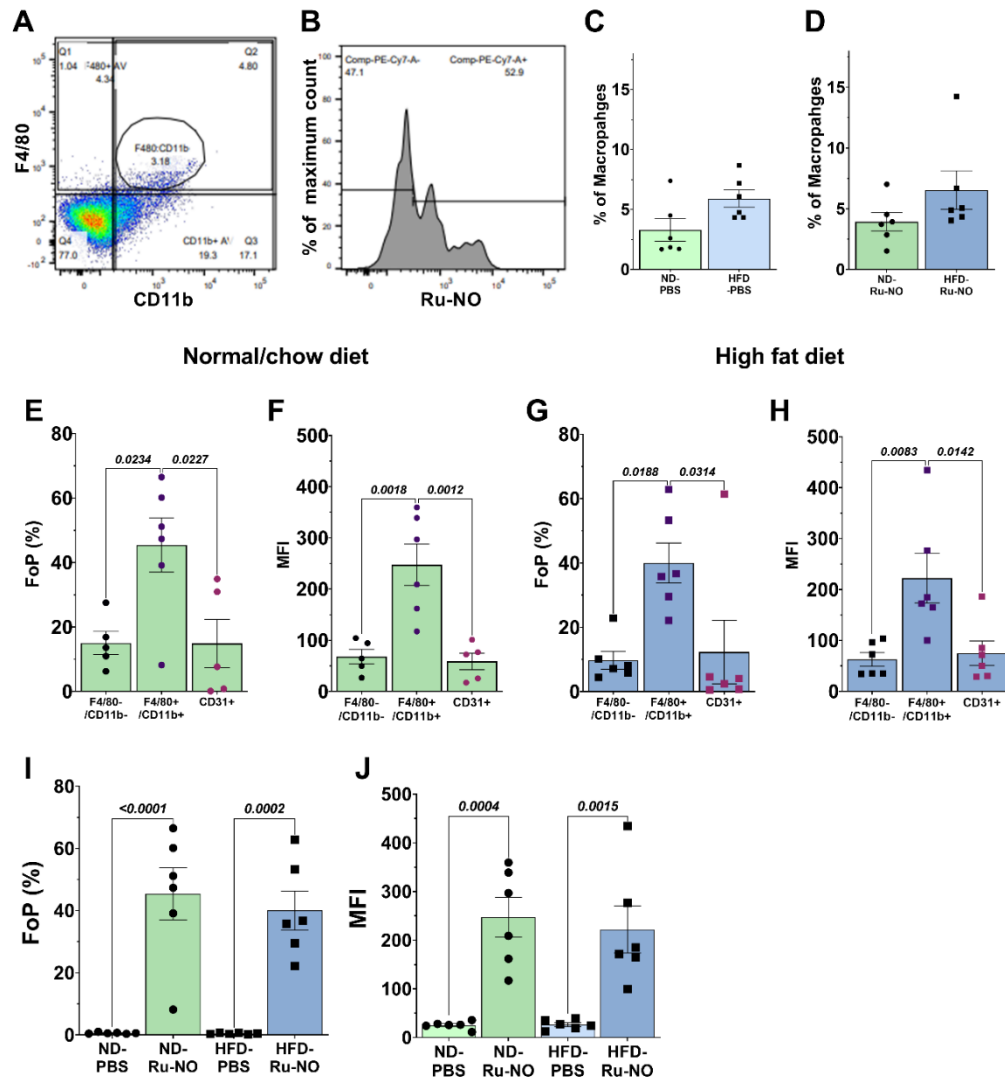

**Supplementary Figure S5. *Ex vivo* uptake of Ru-NO by macrophages in spleen cell suspensions from atherosclerotic mice.** **A.** Plot of the distributions of spleen cell suspensions incubated with antibodies against CD11b and F4/80 markers. **B.** Histogram demonstrating the shift in Ru-NO fluorescence in spleen cell suspensions. Proportion of macrophages in all viable cells following **C.** PBS and **D.** Ru-NO. **E.** FoP and **F.** MFI for Ru-NO fluorescence in **myeloid cells** (CD11b<sup>+</sup>F4/80<sup>-</sup>), macrophages (CD11b<sup>+</sup>F4/80<sup>+</sup>) and endothelial cells (CD31<sup>+</sup>) in chow fed mouse spleens. **G.** FoP and **H.** MFI for Ru-NO fluorescence in **HCD** fed spleens. **I.** FoP and **J.** MFI in CD11b<sup>+</sup>F4/80<sup>+</sup> macrophages comparing spleen cell suspensions from chow and **HCD**-fed mice following PBS or Ru-NO. Mean  $\pm$  SEM, *p* values from an unpaired t test or one-way ANOVA, with Tukey post-hoc test for multiple comparisons (n=5-6 mice/group).

**Supplementary Table.S1: Demographic and Clinical information of patient blood samples for the analyses with the Ru-NO sensor**

| <b>Variables</b>                                       | <b>Overall<br/>N = 50 (%)</b> | <b>No CAD<br/>n=19 (%)</b> | <b>Stable CAD<br/>n=20 (%)</b> | <b>MI<br/>n=11 (%)</b> |
|--------------------------------------------------------|-------------------------------|----------------------------|--------------------------------|------------------------|
| <b>Gender</b>                                          |                               |                            |                                |                        |
| Male                                                   | 35 (70.00)                    | 12 (63.16)                 | 17 (86.84)                     | 6 (54.54)              |
| Female                                                 | 15 (30.00)                    | 7 (36.84)                  | 3 (19.34)                      | 5 (45.45)              |
| <b>Mean age (years) <math>\pm</math> SD</b>            | 67.82 $\pm$<br>11.17          | 64.05 $\pm$<br>13.11       | 70.85 $\pm$<br>7.407           | 68.82 $\pm$<br>12.29   |
| <b>Mean body weight (kg) <math>\pm</math> SD</b>       | 85.12 $\pm$<br>17.67          | 87.58 $\pm$<br>19.66       | 86.35 $\pm$<br>18.75           | 78.00 $\pm$ 8.79       |
| <b>Mean BMI (kg/m<sup>2</sup>) <math>\pm</math> SD</b> | 28.91 $\pm$ 5.53              | 28.75 $\pm$ 4.88           | 29.90 $\pm$ 6.82               | 26.86 $\pm$ 2.16       |
| <b>Medical History</b>                                 |                               |                            |                                |                        |
| Diabetes mellitus                                      | 12 (24.00)                    | 3 (15.78)                  | 6 (30.00)                      | 3 (27.27)              |
| Hyperlipidaemia                                        | 29 (58.00)                    | 10 (52.63)                 | 13 (65.00)                     | 6 (54.54)              |
| Hypertension                                           | 27 (54.00)                    | 7 (36.84)                  | 12 (60.00)                     | 8 (72.72)              |
| Arrhythmia/atrial fibrillation                         | 9 (18.00)                     | 3 (15.78)                  | 5 (25.00)                      | 1 (9.09)               |
| MI (prior admission)                                   | 13 (26.00)                    | 0 (0.00)                   | 10 (50.00)                     | 3 (27.27)              |
| Stroke (prior admission)                               | 3 (6.00)                      | 2 (10.52)                  | 1 (5.00)                       | 0 (0.00)               |
| <b>Medications</b>                                     |                               |                            |                                |                        |
| Statins                                                | 33 (66.00)                    | 10 (52.63)                 | 18 (90.00)                     | 5 (45.45)              |
| ACE inhibitors/ARB                                     | 23 (46.00)                    | 8 (42.10)                  | 13 (65.00)                     | 2 (18.18)              |
| Beta blockers                                          | 17 (34.00)                    | 7 (36.84)                  | 9 (45.00)                      | 1 (9.09)               |
| Aspirin                                                | 24 (48.00)                    | 7 (36.84)                  | 12 (60.00)                     | 5 (45.45)              |
| Metformin                                              | 8 (16.00)                     | 2 (10.52)                  | 5 (25.00)                      | 1 (9.09)               |
| Nitrates                                               | 4 (8.00)                      | 0 (0.00)                   | 3 (15.00)                      | 1 (9.09)               |
| <b>Social History</b>                                  |                               |                            |                                |                        |
| Alcohol drinkers                                       | 16 (32.00)                    | 7 (36.84)                  | 7 (35.00)                      | 2 (18.18)              |
| Current smoker                                         | 8 (16.00)                     | 2 (10.52)                  | 2 (10.00)                      | 4 (36.36)              |
| Former smoker                                          | 25 (50.00)                    | 7 (36.84)                  | 15 (75.00)                     | 3 (27.27)              |

ACE: Angiotensin Converting Enzyme, ARB: Angiotensin receptor blockers, BMI: Body Mass Index, CAD: Coronary artery disease, MI: Myocardial Infarction, SD: Standard Deviation

## Supplementary methods

### S1. Flow cytometry

Flow cytometry was used to detect *in vitro*, *ex vivo* and *in vivo* applications of the sensor. Uptake and detection capacity of the sensor was first demonstrated by flow cytometry in mouse and human macrophages under different *in vitro* stimuli. At the end of the exposure period, the monocytes/**myeloid cells**/macrophages were detached using 0.5% Trypsin EDTA (Life Technologies). In the *in vivo* studies, the tissues from each organ were digested using liberase as described above and the cells were re-suspended in flow cytometry staining buffer (BD Biosciences). The cells were washed in media with FBS and were co-stained with antibodies against F4/80 (FITC), CD11b (PE), CD86 (BV421) and CD206 (AF647) antibodies to identify the myeloid cell populations. An antibody against CD31 (APC) was used as a marker for endothelial cells in *ex vivo* studies. Antibodies were diluted in staining buffer and incubated for 30 min at 4°C in the dark. After incubation the cells were washed and resuspended in FACS fix (BD biosciences). A nuclear stain, DAPI (Sigma-Aldrich) was added 1:500, vortexed and left for 5 minutes before analyses with the BD FACSCanto II™ flow cytometer analyser (BD biosciences). Ru-NO has been shown previously to have a maximum excitation and emission spectrum of 450 nm and 615 nm, respectively<sup>1,2</sup>. Ru-NO was excited by the 488 nm blue Laser and the emitted signal detected using the 780/60 bandpass filter. The data analysis was performed with Flowjo 10.7.1 software (BD biosciences).

### S2. Confocal microscopy

Confocal microscopy was used in both *in vitro* and *in vivo* studies of the sensor. Monocytes/macrophages were grown on glass bottom plates or on low binding plates (Corning) and were incubated with 50 µM Ru-NO for 24 h 37°C in an incubator or live imaging chamber attached to microscope set-up. A nucleic acid stain, DAPI with mounting media (Vectashield, Abacus VEH1200) was added to demarcate the nucleus. In the *in vivo* studies the tissue sections were



fixed in OCT and sectioned at 5  $\mu\text{m}$  using a CryoStat (Leica) and co-stained with DAPI. A Confocal Microscope (Leica TCS SP8X/MP) at  $\lambda_{\text{ex}}=473\text{ nm}$  and  $\lambda_{\text{em}}=565\text{-}645\text{ nm}$  was used for imaging which were analysed using LAS-X imaging software (Leica Microsystems Pty Ltd, NSW, Australia). Fluorescence intensity of different channels were quantified for each image using cell-profiler software.

### **S3. Mass Cytometry (cytometry by time of flight, CyTOF) analysis**

THP-1 monocytes and macrophages were treated with 10 and 50  $\mu\text{M}$  of Ru-NO and incubated for 24 h. At the end of treatment, the cells were trypsinised, resuspended in PBS and centrifuged at 300 x g in 4°C for 5 mins. The cell suspension was then incubated with 1:200 dilution of 10  $\mu\text{M}$  Cell-ID Cisplatin 195Pt (Fluidigm) for 5 minutes. Cells were quenched by adding 10 ml Maxpar® Cell Staining Buffer (Fluidigm). Samples were centrifuged at 300 x g in 4°C for 5 mins. The cells were re-suspended in Maxpar® Cell Staining Buffer then stained with an antibody cocktail containing anti-CD45-154Sm, anti-CD3-170Er, anti-CD20-147Sm, anti-CD4-174Yb, anti-CD8-168Er, anti-CD14-160Gd and anti-CD16-165Ho (Maxpar® Human Peripheral Blood Basic I Phenotyping Panel Kit, 7 Markers). After incubation for 30 mins, the cells were centrifuged and washed in Maxpar® Cell Staining Buffer. The cells were fixed in fresh 1.6% paraformaldehyde in Maxpar® PBS (1:9) and incubated for a further 20 mins. The cells were centrifuged at 800 x g for 5 mins, the resulting pellet was resuspended in cell-intercalation solution (1:999 dilution of 125  $\mu\text{M}$  Intercalator-Ir in Maxpar Fix and Perm Buffer) and incubated for at least 1 h at room temperature. Cells were washed and resuspended in Maxpar® Cell Acquisition Solution containing 0.1x EQ™ Four element Calibration Beads. Cell suspensions were analysed using the Helios CyTOF System (Fluidigm) and analysed using the CyTOF v7.0 and Flowjo software.

#### **S4. Western Blot Analysis for iNOS**

BMDMs were analysed for iNOS protein expression using Western Blot as previously described<sup>3</sup> using iNOS antibody (Abcam, ab49999) with  $\alpha$ -tubulin (Abcam, ab40742) loading control. Briefly, 10-30  $\mu$ g of protein was loaded onto a 4% to 12% gel (Invitrogen) and run at 120 mA for 1 h. The gels were transferred onto nitrocellulose and blocked for 1 hour in 10% non-fat milk powder. Anti-iNOS antibody was added at 1:1000 and incubated overnight at 4°C. Blots were washed and the secondary antibody added for 1 h at room temperature before the blot was visualised using a ChemiDoc (BIO-RAD).

#### **S5. Toxicity and distribution studies in mice**

A pilot study was conducted to determine the optimum concentration of the Ru-NO for the *in vivo* studies, to understand the sensor distribution and to assess toxicity. C57BL/6J mice were fed on a chow diet, water provided *ad libitum* and were used for distribution studies at 4-12 weeks of age. Either 0.6 or 2.4  $\mu$ M/kg of Ru-NO or vehicle control (PBS) was injected by tail vein and the mice were monitored for 24 h post-exposure. Mice were deeply anaesthetised using a single administration of 5% isoflurane via inhalation and whole blood collected via cardiac puncture. Organs and tissues were harvested immediately after exsanguination (aorta, heart, bone marrow, spleen, liver and kidneys). For *in vivo* Ru-NO detection, tissues were harvested and kept on ice in Iscove's Modified Dulbecco's Medium (IMDM) until processing. Each tissue was cut into multiple sections and added to pre-warmed Hanks' Balanced Salt solution with Liberase (1:100 dilution) and incubated for 45 mins at 37°C in 5% CO<sub>2</sub> for tissue digestion. Cold IMDM (Sigma Aldrich) with 10% FBS was added at the end of the digestion process, cells strained using a Greiner 40 $\mu$ m Easy strainer (Greiner) and centrifuged at 800 x g rpm for 5min. The cell pellet was resuspended in 1 mL of IMDM and then washed for staining and flow cytometry analysis to assess the presence of NO bound sensor. At the end of the pilot study a 2.4  $\mu$ M/kg (40  $\mu$ M) concentration was selected for *in vivo* studies. This selected concentration was then injected intravenously and the mice were humanely

killed at 5 min, 2, 4, 6 and 24 h after the injection to determine the time-course distribution of the sensor.

## References

1. Vidanapathirana AK, Pullen BJ, Zhang R, Duong M, Goyne JM, Zhang X, Bonder CS, Abell AD, Bursill CA, Nicholls SJ, Psaltis PJ. A Novel Ruthenium-based Molecular Sensor to Detect Endothelial Nitric Oxide. *Sci Rep* 2019;**9**:1720.
2. Zhang R, Ye Z, Wang G, Zhang W, Yuan J. Development of a ruthenium(II) complex based luminescent probe for imaging nitric oxide production in living cells. *Chemistry* 2010;**16**:6884-6891.
3. Bailey JD, Shaw A, McNeill E, Nicol T, Diotallevi M, Chuaiphichai S, Patel J, Hale A, Channon KM, Crabtree MJ. Isolation and culture of murine bone marrow-derived macrophages for nitric oxide and redox biology. *Nitric Oxide* 2020;**100-101**:17-29.
